# Supplementary material
Source: publisher site journal article supplement (https://static.cambridge.org/content/id/urn:cambridge.org:id:article:S1751731120001664/resource/name/S1751731120001664supp001.docx)
Supplement: Supplementary file 1 [file S1751731120001664supp001.docx]

**Carcass gain per kg feed intake: developing a stakeholder-driven benchmark for comparing grow-finishing pig performance**

Ilias Chantziaras, Jef Van Meensel, Isabelle Hoschet, Frederik Leen, Lies Messely, Dominiek Maes, Sam Millet

*Animal* journal

Supplementary Table S1. Knowledge input over feed conversion ratio (FCR) in pigs (preparatory literature searches)

| Input | Topic | Selected references | Motivation |
| --- | --- | --- | --- |
| Literature search 1  (to prepare interviews) | **FCR as a tool for:** |  | Highlight importance to engage stakeholders |
| - production efficiency | Douglas *et al.* (2015)1, Patience (2015)2 |
| - farm profitability | Hermersch *et al.* (2015)3, Andersson *et al.* (1997)4 |
| **Formulas used to calculate FCR** |  | Increase awareness to both farmers and the research team |
| - basic formula (no adjustments) | Pierozan *et al.* (2016)5, Agostini *et al.* (2014)6 |
| - revised formula ( w adjustments) | Goncalves *et al.* (2017)7, Berry and Pryce (2014)8 |
| **Factors influencing FCR** |  | Designate the main factors that seem to affect FCR. List search terms for literature search 2 |
| feed/water | Harris *et al.* (2012)9, Vukmirović (2017)10 |
| management/infrastructure | Gaines *et al.* (2012)11 |
| health/genetics | Dritz (2012)12 |
| Literature search 2 (to prepare focus group meetings) | **Factors influencing FCR related to:** |  | Prepare presentation with factors influencing FCR to communicate results to groups of experts that will prioritize afterwards the most important elements. |
| - **feed/water intake** |  |
| feed processing (*e.g.* pellet) | Nemechek *et al.* (2016)13, Edge *et al.* (2005)14 |
| schema (*e.g. ad libitum*) | Colpoys *et al.* (2016)15, Patience (2012)16 |
| organoleptic qualities (*e.g.* taste) | Maciorowski *et al.* (2007)17 |
| contaminants (*e.g.* mycotoxins*)* | Richard *et al.* (2007)18, Maciorowski *et al.* (2007)17 |
| composition (*e.g.* amino acid) | Kerr and Shurson(2013)19 |
| feed wastage/spillage | Patience *et al.* (2015)2, Brumm (2010)20 |
| feed/water quality | Umar *et al.* (2014)21, Coleman *et al.* (2003)22 |
| feeder/drinker type | Brumm (2010)20 |
| - **management/infrastructure** |  |
| farmer’s competency | Tokach (2012)23, Florh *et al.* (2014)24 |
| pen density | Pierozan *et al.* (2016)5 |
| split sex pen | Pierozan *et al.* (2016)5 |
| floor type | Agostini *et al.* (2014)6 |
| antimicrobial use | Collineau *et al.* (2017)25, Postma *et al.* (2017)26 |
| climatic environment | Renaudeau *et al.* (2012)27 |
| biosecurity | Laanen *et al.* (2012)28 |
| - **health/genetics** |  |
| mortality | Oliveira *et al.* (2009)29, Maes *et al.* (2004)30 |
| gut health/microbiota | Quan *et al.* (2018)31, Yang *et al.* (2017)32 |
| breed | Reyer *et al.* (2017)33, Camara *et al.* (2016)34 |
| selection (*e.g.* low residual feed intake) | Saintilan *et al.* (2013)35, Harris *et al.* (2012)9 |
| body weight | Patience et al. (2015)2, Agostini et al. (2014)6 |

**Reference list**

1. Douglas S, Szyszka O, Stoddart K et al. Animal and management factors influencing grower and finisher pig performance and efficiency in European systems: a meta-analysis. *Animal* 2015; 9: 1210-20.

2. Patience JF, Rossoni-Serão MC, Gutiérrez NAJJoas et al. A review of feed efficiency in swine: biology and application. *Journal of animal science and biotechnology* 2015; 6: 33.

3. Hermesch S, Li L, Doeschl-Wilson A et al. Selection for productivity and robustness traits in pigs. *Animal Production Science* 2015; 55: 1437-47.

4. Andersson K, Schaub A, Andersson K et al. The effects of feeding system, lysine level and gilt contact on performance, skatole levels and economy of entire male pigs. *Livestock Production Science* 1997; 51: 131-40.

5. Pierozan C, Agostini P, Gasa J et al. Factors affecting the daily feed intake and feed conversion ratio of pigs in grow-finishing units: the case of a company. *Porcine Health Mnagement* 2016; 2: 7.

6. Agostini P, Fahey A, Manzanilla E et al. Management factors affecting mortality, feed intake and feed conversion ratio of grow-finishing pigs. *Animal* 2014; 8: 1312-8.

7. Gonçalves MAD, Dritz SS, Tokach MD. Fact sheet – Feed efficiency adjustments to compare group close-outs in finishing pigs. *Journal of Swine Health and Production* 2017; 25: 73-5.

8. Berry D, Pryce J. Feed efficiency in growing and mature animals. In *Proceedings of the 10th World Congress on Genetics Applied to Livestock Production*, 7-22 August 2014, Vancouver, Canada: 1-6.

9. Harris A, Patience JF, Lonergan SM et al. Improved nutrient digestibility and retention partially explains feed efficiency gains in pigs selected for low residual feed intake. *Journal of Animal Science* 2012; 90: 164-6.

10. Vukmirović Đ, Čolović R, Rakita S et al. Importance of feed structure (particle size) and feed form (mash vs. pellets) in pig nutrition–A review. *Animal feed science and technology* 2017; 233: 133-44.

11. Gaines A, Peterson B, Mendoza O. Herd management factors that influence whole herd feed efficiency. In *Feed efficiency in swine*, Wageningen Academic Publishers, Wageningen, the Netherlands, 2012: 15-39.

12. Dritz S. Influence of health on feed efficiency. In *Feed efficiency in swine*: Wageningen Academic Publishers, Wageningen, the Netherlands, 2012: 225-37.

13. Nemechek J, Tokach M, Dritz S et al. Effects of diet form and corn particle size on growth performance and carcass characteristics of finishing pigs. *Animal Feed Science and Technology* 2016; 214: 136-41.

14. Edge H, Dalby J, Rowlinson P et al. The effect of pellet diameter on the performance of young pigs. *Livestock Production Science* 2005; 97: 203-9.

15. Colpoys JD, Johnson AK, Gabler NK. Daily feeding regimen impacts pig growth and behavior. *Physiology & behavior* 2016; 159: 27-32.

16. Patience J. The influence of dietary energy on feed efficiency in grow-finish swine. *Feed efficiency in swine*, Wageningen Academic Publishers, Wageningen, the Netherlands, 2012: 101-29.

17. Maciorowski K, Herrera P, Jones F et al. Effects on poultry and livestock of feed contamination with bacteria and fungi. *Animal Feed Science and Technology* 2007; 133: 109-36.

18. Richard JL. Some major mycotoxins and their mycotoxicoses—An overview. *International journal of food microbiology* 2007; 119: 3-10.

19. Kerr BJ, Shurson GC. Strategies to improve fiber utilization in swine. *Journal of Animal Science and Biotechnology* 2013; 4: 11.

20. Brumm M. Understanding feeders and drinkers for grow-finish pigs. *Congreso nacional de producción porcina*, p. 27-37.

21. Umar S, Munir M, Azeem T et al. Effects of water quality on productivity and performance of livestock: A mini review. *Veterinaria* 2014; 2: 11-15.

22. Coleman SW, Moore JE. Feed quality and animal performance. *Field Crops Research* 2003; 84: 17-29.

23. Tokach M, Goodband R, DeRouchey J et al. Feeding and barn management strategies that maximize feed efficiency. *Feed efficiency in swine*, Wageningen Academic Publishers, Wageningen, the Netherlands, 2012: 41-62.

24. Flohr JR, Tokach MD, DeRouchey JM et al. Feed efficiency: an assessment of current knowledge from a voluntary subsample of the swine industry. *Journal of Extension* 2014; 52: 6.

25. Collineau L, Backhans A, Dewulf J et al. Profile of pig farms combining high performance and low antimicrobial usage within four European countries. *Veterinary Record* 2017; 181: 657-665.

26. Postma M, Vanderhaeghen W, Sarrazin S et al. Reducing antimicrobial usage in pig production without jeopardizing production parameters. *Zoonoses and public health* 2017; 64: 63-74.

27. Renaudeau D, Gilbert H, Noblet J. Effect of climatic environment on feed efficiency in swine. *Feed efficiency in swine*, Wageningen Academic Publishers, Wageningen, the Netherlands, 2012: 183-210.

28. Laanen M, Persoons D, Ribbens S et al. Relationship between biosecurity and production/antimicrobial treatment characteristics in pig herds. *The Veterinary Journal* 2013; 198: 508-512.

29. Oliveira J, Yus E, Guitián F. Effects of management, environmental and temporal factors on mortality and feed consumption in integrated swine fattening farms. *Livestock Science* 2009; 123: 221-229.

30. Maes D, Duchateau L, Larriestra A et al. Risk Factors for Mortality in Grow‐finishing Pigs in Belgium. *Zoonoses and Public Health* 2004; 51: 321-6.

31. Quan J, Cai G, Ye J et al. A global comparison of the microbiome compositions of three gut locations in commercial pigs with extreme feed conversion ratios. *Scientific reports* 2018; 8: 4536.

32. Yang H, Huang X, Fang S et al. Unraveling the Fecal Microbiota and Metagenomic Functional Capacity Associated with Feed Efficiency in Pigs. *Frontiers in microbiology* 2017; 8: 1555.

33. Reyer H, Shirali M, Ponsuksili S et al. Exploring the genetics of feed efficiency and feeding behaviour traits in a pig line highly selected for performance characteristics. *Molecular genetics and genomics* 2017; 292: 1001-1011.

34. Càmara L, Berrocoso J, Coma J et al. Growth performance and carcass quality of crossbreds pigs from two Pietrain sire lines fed isoproteic diets varying in energy concentration. *Meat science* 2016; 114: 69-74.

35. Saintilan R, Brossard L, Vautier B et al. Phenotypic and genetic relationships between growth and feed intake curves and feed efficiency and amino acid requirements in the growing pig. *Animal* 2015; 9: 18-27.

Supplementary Table S2. Calculating steps for determining the “technical” feed conversion ratio (FCRtechnical) formula in pigs.

| Step | Calculating formula |
| --- | --- |
| I. Calculate daily chance to die |  |
| II. Calculate average days present per pig |  |
| III. Calculate corrected feed intake |  |
| IV. Calculate FCR corrected for mortality |  |
| V. Standardize FCR for initial weight (FCRst. in.) |  |
| VI. Assign a correction factor |  |
| VII. Standardize for a weight trajectory of 25kg to 115kg (live weight) |  |

Feed conversion ratio for a fattening pig weighing 25kg.

Supplementary Material S1. Calculating steps for determining the “FCRtechnical” formula and the “CGFstandardized“ formula . FCR stands for feed conversion ratio and CGF for carcass growth per kg feed

Explanation of the 7-step FCRtechnical formula.

Step I. As a first step, the “daily chance to die” is calculated as 1 minus the root of “1 - mortality rate” indexed by the duration of the fattening round.

Step II. The “average number of days present per pig” is calculated as the summation of “1- daily chance to die” indexed again by the duration of the fattening round.

Step III. The third step is the correction of feed intake per fattened pig by multiplying with the fraction of “average number days present per pig” to the duration of the fattening round.

Step IV. The result from Step III is used as the numerator to calculate the FCR that is now corrected for mortality.

Step V. For step 5, FCR corrected for deviating weaned weight is calculated. To calculate this, we first multiply the FCR corrected for mortality (Step IV) by the actual live weight growth of the animal during the fattening period. We then assign a fixed FCR value for a 25kg pig. After using the 2016 figures from the Flemish Government Agriculture report this value was set Then we calculate how much the initial weight of the pig deviates from the standardized initial weight (25kg) in our formula. We multiply it with the . Then, the numerator expresses the feed used in the growth trajectory that deviates from the standardized initial weight. This results in adding the kg feed used in case the initial weight was lower than the standardized initial weight or subtracting the amount of feed used in case the initial weight was higher than the standard. We consequently divide this numerator again with the growth trajectory that has been standardized to the standard initial weight ( This formula informs of the FCR over the growth trajectory from the standard initial weight to the actual final weight of a pig.

Step VI. Here we estimate a farm specific correction factor to correct the feed used for the deviating mass of growth between the actual final live weight of the animal and the standardized final live weight. The correction factor is the slope of the linear regression between the standardized FCR from step V and the assumed FCR at the standardized initial weight (25kg liveweight) as function of the live weight growth. This parameter gives us a measure of the change in FCR per kg of live weight growth that deviates from the standard final live weight.

Step VII. In this step we calculate the deviation of the actual final weight and the standard final weight. This difference is multiplied with the correction factor from step VI to adjust the FCR for the deviating actual final weight from the standardized final weight. If the actual final weight is lower than the standard then we subtract the multiplication of the correction factor and the deviating weight to the FCRst. in. to get a lower FCR standardized for initial and final weight. Likewise if the actual final weight is higher than the standard final carcass weight the FCRst. in. will be higher since we add the deviating mass of carcass multiplied with the correction factor.

Explanation of the 7-step CGFstandardized formula.

Step I. As a first step, the “daily chance to die” is calculated as 1 minus the root of “1 - mortality rate” indexed by the duration of the fattening round.

Step II. The “average number of days present per pig” is calculated as the summation of “1- daily chance to die” indexed again by the duration of the fattening round.

Step III. The third step is the correction of feed intake per fattened pig by multiplying with the fraction of “average number days present per pig” to the duration of the fattening round.

Step IV. The carcass growth per kg feed (CGF) corrected for mortality is calculated at this step. As numerator, the carcass weight of the fattened pig minus the product of the weight of the piglet at the start of the fattening round (initial weight) with the piglet carcass yield. The result from Step III is used as the denominator.

Step V. At this step, we standardize CGF for initial weight. Regarding the numerator: First we calculate the feed used per pig (corrected for mortality) over the actual carcass growth trajectory of the pig. . Then we calculate how much the initial weight of the pig deviated from the standardized initial weight in our formula . We multiply it with the assumed feed efficiency at the standardized initial weight to have the feed used in the growth trajectory that deviates from the standardized initial weight. This results in adding the kg feed used in case the initial weight was lower than the standardized initial weight or subtracting the amount of feed used in case the initial weight was higher than the standard. The numerator thus becomes the corrected amount of feed used standardized to the standard initial weight.

We consequently divide this numerator with the growth trajectory that has been standardized to the standard initial weight. ( Resulting in a measure of feed efficiency over the growth trajectory from the standard initial weight to the actual final weight of the pig.

Step VI. Here we estimate a farm specific correction factor to correct the feed used for the deviating mass of growth between the actual final weight of the carcass and the standardized final carcass weight.

The correction factor is the slope of the linear regression between the standardized CGFin from step V and the assumed CGF at the standardized initial weight (25kg liveweight) as function of the carcass growth. This parameter gives us a measure of the change in CGF per kg of carcass growth that deviates from the standard final carcass weight.

Step VII. We calculate the deviation of the actual final weight and the standard final weight. This mass is multiplied with the correction factor from step VI to adjust the CGF for the deviating actual final weight from the standardized final weight. If the actual final carcass weight is lower than the standard then the multiplication of the correction factor and the deviating weight to the CGFst. in. is added resulting in a higher CGF standardized for initial and final weight. Likewise if the actual final weight is higher than the standard final carcass weight the standardized CGF will be lower since we subtract the deviating mass of carcass multiplied with the correction factor.

Supplementary Table S3. Two-variable data table sensitivity analysis for transforming a. pig carcass weight measurements to live weight measurements and b. piglet live weight measurements to carcass weight measurements to test the effects of variability due to varying carcass yield (horizontal axis) and varying weight (vertical axis) on the carcass growth per kg feed (CGF) formula.

|  | a) | Pig carcass yield | | | | | | | | | | |  |  |
| --- | --- | --- | --- | --- | --- | --- | --- | --- | --- | --- | --- | --- | --- | --- |
|  |  | 0.75 | 0.76 | 0.77 | 0.78 | 0.79 | 0.8 | 0.81 | 0.82 | 0.83 | 0.84 | 0.85 |  | difference highest-lowest carcass yield |
| pig weight | 107 | 0.341 | 0.335 | 0.329 | 0.324 | 0.319 | 0.314 | 0.309 | 0.304 | 0.299 | 0.294 | 0.290 |  | 0.040 |
| 108 | 0.346 | 0.340 | 0.334 | 0.329 | 0.323 | 0.318 | 0.313 | 0.308 | 0.303 | 0.299 | 0.294 |  | 0.041 |
| 109 | 0.351 | 0.345 | 0.339 | 0.334 | 0.328 | 0.323 | 0.318 | 0.313 | 0.308 | 0.303 | 0.299 |  | 0.041 |
| 110 | 0.356 | 0.350 | 0.344 | 0.338 | 0.333 | 0.328 | 0.322 | 0.317 | 0.312 | 0.308 | 0.303 |  | 0.042 |
| 111 | 0.361 | 0.355 | 0.349 | 0.343 | 0.338 | 0.332 | 0.327 | 0.322 | 0.317 | 0.312 | 0.307 |  | 0.042 |
| 112 | 0.366 | 0.360 | 0.354 | 0.348 | 0.343 | 0.337 | 0.332 | 0.327 | 0.322 | 0.317 | 0.312 |  | 0.042 |
| 113 | 0.371 | 0.365 | 0.359 | 0.353 | 0.347 | 0.342 | 0.336 | 0.331 | 0.326 | 0.321 | 0.316 |  | 0.043 |
| 114 | 0.376 | 0.370 | 0.364 | 0.358 | 0.352 | 0.347 | 0.341 | 0.336 | 0.331 | 0.326 | 0.321 |  | 0.043 |
| 115 | 0.381 | 0.375 | 0.369 | 0.363 | 0.357 | **0.351** | 0.346 | 0.340 | 0.335 | 0.330 | 0.325 |  | 0.043 |
| 116 | 0.386 | 0.380 | 0.373 | 0.368 | 0.362 | 0.356 | 0.350 | 0.345 | 0.340 | 0.335 | 0.330 |  | 0.044 |
| 117 | 0.391 | 0.385 | 0.378 | 0.372 | 0.366 | 0.361 | 0.355 | 0.350 | 0.344 | 0.339 | 0.334 |  | 0.044 |
| 118 | 0.396 | 0.390 | 0.383 | 0.377 | 0.371 | 0.365 | 0.360 | 0.354 | 0.349 | 0.344 | 0.339 |  | 0.045 |
| 119 | 0.401 | 0.395 | 0.388 | 0.382 | 0.376 | 0.370 | 0.364 | 0.359 | 0.353 | 0.348 | 0.343 |  | 0.045 |
| 120 | 0.406 | 0.400 | 0.393 | 0.387 | 0.381 | 0.375 | 0.369 | 0.364 | 0.358 | 0.353 | 0.347 |  | 0.045 |
| 121 | 0.411 | 0.404 | 0.398 | 0.392 | 0.386 | 0.380 | 0.374 | 0.368 | 0.363 | 0.357 | 0.352 |  | 0.046 |
| 122 | 0.416 | 0.409 | 0.403 | 0.397 | 0.390 | 0.384 | 0.378 | 0.373 | 0.367 | 0.362 | 0.356 |  | 0.046 |
| 123 | 0.421 | 0.414 | 0.408 | 0.401 | 0.395 | 0.389 | 0.383 | 0.377 | 0.372 | 0.366 | 0.361 |  | 0.046 |
| difference  highest-lowest weight | | 0.045 | 0.046 | 0.047 | 0.047 | 0.048 | 0.048 | 0.049 | 0.050 | 0.050 | 0.051 | 0.051 |  |  |

| b) |  | Piglet carcass yield | | | | | | | | | | |  |  |
| --- | --- | --- | --- | --- | --- | --- | --- | --- | --- | --- | --- | --- | --- | --- |
|  |  | 0.67 | 0.68 | 0.69 | 0.7 | 0.71 | 0.72 | 0.73 | 0.74 | 0.75 | 0.76 | 0.77 |  | difference highest-lowest carcass yield |
| piglet weight | 17 | 0.306 | 0.305 | 0.304 | 0.304 | 0.303 | 0.302 | 0.302 | 0.301 | 0.300 | 0.300 | 0.299 |  | 0.006 |
| 18 | 0.303 | 0.302 | 0.302 | 0.301 | 0.300 | 0.300 | 0.299 | 0.298 | 0.298 | 0.297 | 0.296 |  | 0.007 |
| 19 | 0.301 | 0.300 | 0.299 | 0.298 | 0.298 | 0.297 | 0.296 | 0.296 | 0.295 | 0.294 | 0.294 |  | 0.007 |
| 20 | 0.298 | 0.297 | 0.297 | 0.296 | 0.295 | 0.294 | 0.294 | 0.293 | 0.292 | 0.291 | 0.291 |  | 0.007 |
| 21 | 0.296 | 0.295 | 0.294 | 0.293 | 0.292 | 0.292 | 0.291 | 0.290 | 0.289 | 0.289 | 0.288 |  | 0.008 |
| 22 | 0.293 | 0.292 | 0.291 | 0.291 | 0.290 | 0.289 | 0.288 | 0.287 | 0.287 | 0.286 | 0.285 |  | 0.008 |
| 23 | 0.291 | 0.290 | 0.289 | 0.288 | 0.287 | 0.286 | 0.286 | 0.285 | 0.284 | 0.283 | 0.282 |  | 0.009 |
| 24 | 0.288 | 0.287 | 0.286 | 0.285 | 0.285 | 0.284 | 0.283 | 0.282 | 0.281 | 0.280 | 0.279 |  | 0.009 |
| 25 | 0.286 | 0.285 | 0.284 | 0.283 | 0.282 | **0.281** | 0.280 | 0.279 | 0.278 | 0.277 | 0.276 |  | 0.009 |
| 26 | 0.283 | 0.282 | 0.281 | 0.280 | 0.279 | 0.278 | 0.277 | 0.276 | 0.275 | 0.275 | 0.274 |  | 0.010 |
| 27 | 0.281 | 0.280 | 0.279 | 0.278 | 0.277 | 0.276 | 0.275 | 0.274 | 0.273 | 0.272 | 0.271 |  | 0.010 |
| 28 | 0.278 | 0.277 | 0.276 | 0.275 | 0.274 | 0.273 | 0.272 | 0.271 | 0.270 | 0.269 | 0.268 |  | 0.010 |
| 29 | 0.276 | 0.275 | 0.274 | 0.273 | 0.271 | 0.270 | 0.269 | 0.268 | 0.267 | 0.266 | 0.265 |  | 0.011 |
| 30 | 0.273 | 0.272 | 0.271 | 0.270 | 0.269 | 0.268 | 0.267 | 0.265 | 0.264 | 0.263 | 0.262 |  | 0.011 |
| 31 | 0.271 | 0.270 | 0.268 | 0.267 | 0.266 | 0.265 | 0.264 | 0.263 | 0.262 | 0.260 | 0.259 |  | 0.011 |
| 32 | 0.268 | 0.267 | 0.266 | 0.265 | 0.264 | 0.262 | 0.261 | 0.260 | 0.259 | 0.258 | 0.256 |  | 0.012 |
| 33 | 0.266 | 0.265 | 0.263 | 0.262 | 0.261 | 0.260 | 0.258 | 0.257 | 0.256 | 0.255 | 0.254 |  | 0.012 |
|  |  |  |  |  |  |  |  |  |  |  |  |  |  |  |
|  | Difference highest and lowest weight | 0.040 | 0.040 | 0.041 | 0.041 | 0.042 | 0.043 | 0.043 | 0.044 | 0.044 | 0.045 | 0.046 |  |  |
